# Supplementary material for: Functional Characterization of Domains of IPS-1 Using an Inducible Oligomerization System
Source: PLOS journal article supplement (doi:10.1371/journal.pone.0053578), 2013-01-07
Supplement: S1 (10.1371/journal.pone.0053578.s001) [file journal.pone.0053578.s001]

# Supporting Information

## Supplementary Figure 1

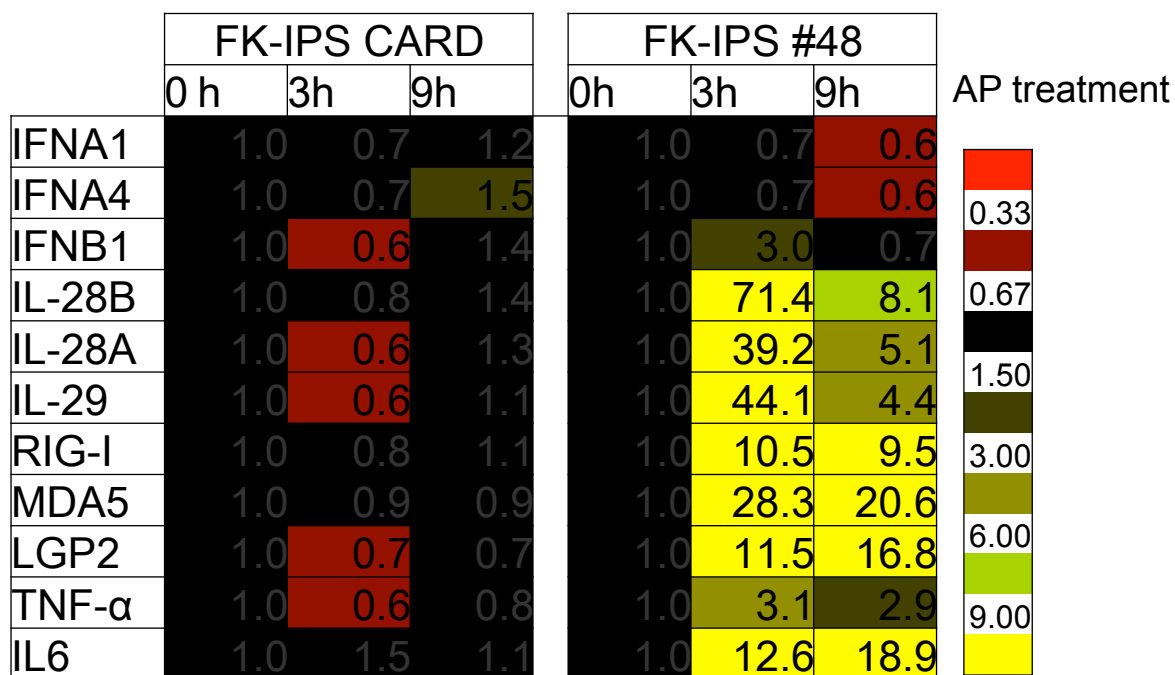

**Figure S1. Microarray analysis of mRNAs induced by oligomerized IPS-1 CARD or IPS-1.**

HeLa cells stably expressing FK-IPS or FK-IPS CARD were stimulated with AP20187 for the indicated time. Total RNA extracted from these cells was subjected to analysis using a DNA microarray (Genopal, Mitsubishi Rayon) of interferon-stimulated genes and interferon genes. Relative mRNA levels using a control expression as 1.0 are shown.
