# Supplementary material for: Functional Characterization of Domains of IPS-1 Using an Inducible Oligomerization System
Source: PLOS journal article supplement (doi:10.1371/journal.pone.0053578), 2013-01-07
Supplement: S6 (10.1371/journal.pone.0053578.s006) [file journal.pone.0053578.s006]

Supplementary Figure 6

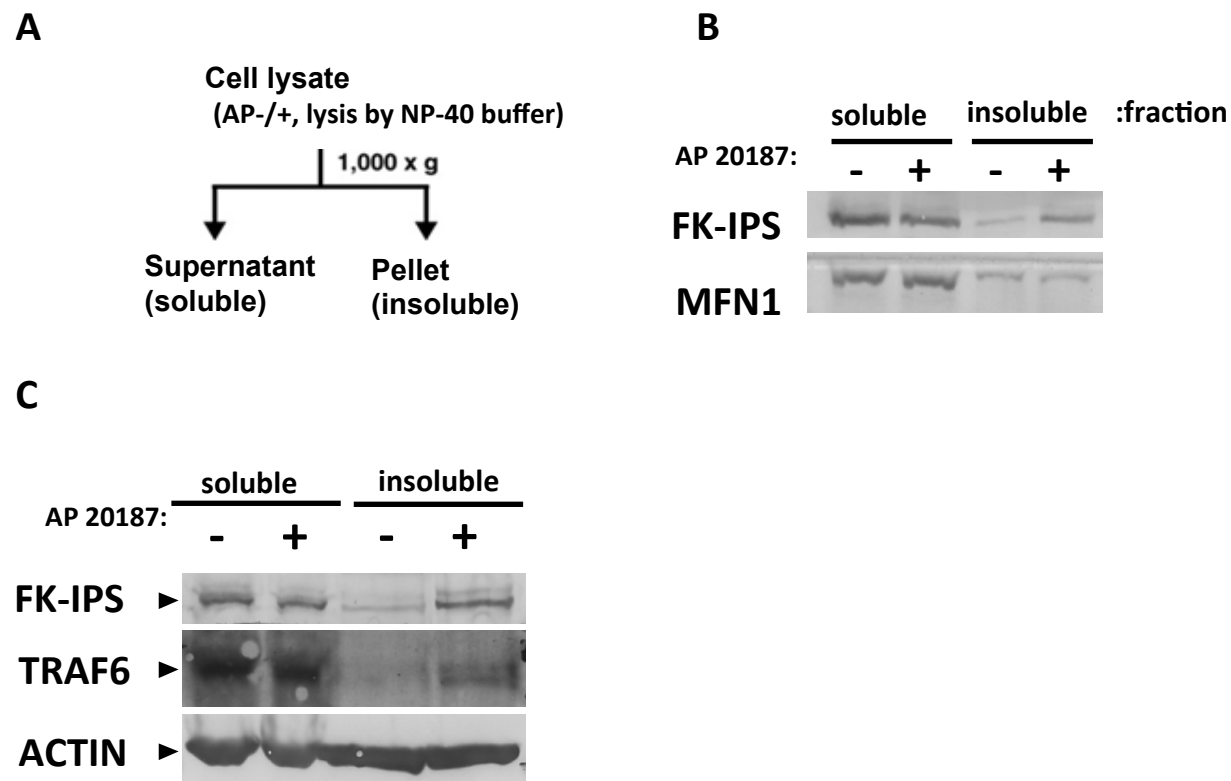

**Figure S6. Recruitment of TRAF6 into NP-40 insoluble fraction upon oligomerization of IPS-1.**

**A.** Scheme for isolation of soluble and insoluble fractions by differential centrifugation.

**B and C.** Immunoblot analysis of soluble/insoluble fractions separated by differential centrifugation. FK-IPS DCARD stable cells were cultured for 3h in the absence or presence of AP. Cell lysates were separated by differential centrifugation. FK-IPS DCARD and endogenous MFN1, TRAF6, and actin were detected by immunoblotting.
